# Supplementary material for: Phytochemical Characterization and Biological Activities of Stenomesson miniatum Bulb Extract, a Medicinal Plant of the Andes.
Source: Preprints.org preprint supplement (doi:10.20944/preprints202305.0921.v2), 2023-12-14
Supplement: Supplementary file 1 [file supplementary]

**Supplementary Information SI3**

**Phytochemical characterization and biological activities of *Stenomesson miniatum* bulb extract, a medicinal plant of the Andes.**

Mariacaterina Lianzaa*, Carmela Fimognaria, Jean-Marc Nuzillardb, Ferruccio Polic, Jean-Hugues Renaultb, Francesca Bonvicinic, Giulia Grecod, Eleonora Turrinia

aDepartment for Life Quality Studies, University of Bologna, 47921 Rimini, Italy

b CNRS, ICMR UMR 7312, University of Reims Champagne-Ardenne, 51097 Reims, France

c Department of Pharmacy and Biotechnology, University of Bologna, 40138 Bologna, Italy

d Department of Chemistry, University of Bologna, 40126 Bologna, Italy

*Correspondence: mariacaterina.lianz3@unibo.it

**UPLC-HRMS DATA**

**Table SI2:** Calculated molecular formulas of alkaloids detected in the fractions.

| FRACTION | CALCULATED MOLECULAR FORMULA | RETENTION TIME  [min] |
| --- | --- | --- |
| A1 | ----- | ---- |
| A2 | C18H19NO5, C15H13NO3 C18H21NO5, C14H9NO2 | 7.00, 10.09,  12.59, 14.06 |
| A3 | C18H18N2O4, C18H21NO5,C14H9NO2 | 11.82, 12.59,  14.06 |
| A4 | C18H21NO5 | 12.59 |
| A5 | C18H21NO5 | 12.59 |
| A6 | C19H23NO5, C18H21NO5 | 9.56, 12.59 |
| A7 | C19H23NO5 | 9.58 |
| A8 | C17H19NO4, C19H23NO5, C16H17NO4 | 7.01, 9.62,  10.02 |
| A9 | C17H19NO4 | 6.99 |
| A10 | C19H25NO5, C16H17NO3,C17H19NO4 | 4.92, 6.19,  7.02 |
| A11 | C18H21NO5, C16H17NO3 | 5.03, 6.19 |
| A12 | C18H21NO5, C19H25NO5  C21H28N2O5, C16H17NO3 | 4.56, 4.93  5.16, 6.20 |
| A13 | C18H21NO5, C17H19NO5  C16H17NO3 | 5.02, 5.67,  6.19 |

UPLC-HRMS analysis of extract. a) Blank determination b) BPI chromatograms of *S. miniatum* bulb extract

**a**

**b**

**b**

Extract, RT = 12.59 min

Elemental Composition Report

Mass Calc. Mass mDa PPM DBE i-FIT Norm Conf(%) Formula

332.1503 332.1498 0.5 1.5 8.5 2030.0 n/a n/a C18 H22 N O5

Mass Calc. Mass mDa PPM DBE i-FIT Norm Conf(%) Formula

314.1397 314.1392 0.5 1.6 9.5 1836.3 n/a n/a C18 H20 N O4

**b**

Extract, RT=11.81 min

Mass Calc. Mass mDa PPM DBE i-FIT Norm Conf(%) Formula

327.1343 327.1345 -0.2 -0.6 10.5 1904.5 n/a n/a C18 H19 N2 O4

**b**

Extract, RT = 9.81 min

Elemental Composition Report

Single Mass Analysis

Tolerance = 5.0 PPM / DBE: min = -1.5, max = 50.0 / Element prediction: Off

Number of isotope peaks used for i-FIT = 3

Monoisotopic Mass, Even Electron Ions

Mass Calc. Mass mDa PPM DBE i-FIT Norm Conf(%) Formula

346.1658 346.1654 0.4 1.2 8.5 2035.4 n/a n/a C19 H24 N O5

**b**

Extract, RT = 6.98 min

Mass Calc. Mass mDa PPM DBE i-FIT Norm Conf(%) Formula

302.1393 302.1392 0.1 0.3 8.5 2085.3 n/a n/a C17 H20 N O4

Extract, RT = 6.20 min

**b**

Mass Calc. Mass mDa PPM DBE i-FIT Norm Conf(%) Formula

272.1290 272.1287 0.3 1.1 8.5 2113.0 n/a n/a C16 H18 N O3

**b**

RT = 5.05 min

Mass Calc. Mass mDa PPM DBE i-FIT Norm Conf(%) Formula

332.1497 332.1498 -0.1 -0.3 8.5 2250.6 n/a n/a C18 H22 N O5

**b**

Extract, RT = 4.96 min

Mass Calc. Mass mDa PPM DBE i-FIT Norm Conf(%) Formula

348.1812 348.1811 0.1 0.3 7.5 1775.8 n/a n/a C19 H26 N O5

**b**

Extract, RT = 2.77 min

Mass Calc. Mass mDa PPM DBE i-FIT Norm Conf(%) Formula

363.1923 363.1920 0.3 0.8 7.5 1909.2 0.017 98.33 C19 H27 N2 O5

363.1936 -1.3 -3.6 8.5 1913.3 4.090 1.67 C22 H28 O3 Na

UPLC-HRMS analysis of fractions

Fraction A1

Fraction A1, RT = 14.11 min

Mass Calc. Mass mDa PPM DBE i-FIT Norm Conf(%) Formula

224.0711 224.0712 -0.1 -0.4 10.5 2054.8 n/a n/a C14 H10 N O2

Fraction A1, RT = 11.86 min

Mass Calc. Mass mDa PPM DBE i-FIT Norm Conf(%) Formula

327.1345 327.1345 0.0 0.0 10.5 2097.4 0.002 99.81 C18 H19 N2 O4

327.1361 -1.6 -4.9 11.5 2103.7 6.272 0.19 C21 H20 O2 Na

Fraction A1, RT = 10.34 min

Mass Calc. Mass mDa PPM DBE i-FIT Norm Conf(%) Formula

447.1925 447.1920 0.5 1.1 14.5 1799.0 0.013 98.74 C26 H27 N2 O5

447.1936 -1.1 -2.5 15.5 1803.3 4.375 1.26 C29 H28 O3 Na

Fraction A1, RT = 6.94 min

Mass Calc. Mass mDa PPM DBE i-FIT Norm Conf(%) Formula

238.0870 238.0868 0.2 0.8 10.5 1567.5 n/a n/a C15 H12 N O2

Fraction A1, RT = 3.71 min

Mass Calc. Mass mDa PPM DBE i-FIT Norm Conf(%) Formula

304.1187 304.1185 0.2 0.7 8.5 1698.8 n/a n/a C16 H18 N O5

Fraction A2

Fraction A2, RT = 14.26 min

Mass Calc. Mass mDa PPM DBE i-FIT Norm Conf(%) Formula

360.1815 360.1811 0.4 1.1 8.5 2245.7 n/a n/a C20 H26 N O5

Fraction A2, RT = 14.11 min

Mass Calc. Mass mDa PPM DBE i-FIT Norm Conf(%) Formula

224.0712 224.0712 0.0 0.0 10.5 2165.7 n/a n/a C14 H10 N O2

Fraction A2, RT = 12.59 min

Mass Calc. Mass mDa PPM DBE i-FIT Norm Conf(%) Formula

332.1496 332.1498 -0.2 -0.6 8.5 1708.1 n/a n/a C18 H22 N O5

Fraction A2, RT = 11.85 min

Mass Calc. Mass mDa PPM DBE i-FIT Norm Conf(%) Formula

327.1342 327.1345 -0.3 -0.9 10.5 1896.4 n/a n/a C18 H19 N2 O4

Fraction A2, RT = 13.29 min

Mass Calc. Mass mDa PPM DBE i-FIT Norm Conf(%) Formula

370.1765 370.1783 -1.8 -4.9 11.5 1812.6 n/a n/a C23 H25 N O2 Na

Fraction A2, RT=8.84 min

Elemental Composition Report, Single Mass Analysis

Tolerance = 5.0 PPM / DBE: min = -1.5, max = 50.0 / Element prediction: Off

Number of isotope peaks used for i-FIT = 3

Monoisotopic Mass, Even Electron Ions

Mass Calc. Mass mDa PPM DBE i-FIT Norm Conf(%) Formula

343.1293 343.1294 -0.1 -0.3 10.5 1822.6 0.002 99.77 C18 H19 N2 O5

343.1310 -1.7 -5.0 11.5 1828.7 6.081 0.23 C21 H20 O3 Na

Mass Calc. Mass mDa PPM DBE i-FIT Norm Conf(%) Formula

298.1077 298.1079 -0.2 -0.7 10.5 1111.7 n/a n/a C17 H16 N O4

Fraction A3

Fraction A4

Fraction A5

Fraction A5, RT = 13.92 min

Mass Calc. Mass mDa PPM DBE i-FIT Norm Conf(%) Formula

276.1964 276.1964 0.0 0.0 5.5 1613.1 n/a n/a C17 H26 N O2

Fraction A6

Fraction A7

Fraction A7, RT = 10.98 min

Elemental Composition Report

Single Mass Analysis

Tolerance = 5.0 PPM / DBE: min = -1.5, max = 50.0 / Element prediction: Off

Number of isotope peaks used for i-FIT = 3

Monoisotopic Mass, Even Electron Ions

Mass Calc. Mass mDa PPM DBE i-FIT Norm Conf(%) Formula

302.1391 302.1392 -0.1 -0.3 8.5 1455.6 n/a n/a C17 H20 N O4

Fraction A8

Fraction A9

Fraction A10

Fraction A11

Fraction A12

A12

A12

Fraction A12, RT = 6.87 min

Maximum: 5.0 5.0 50.0

Mass Calc. Mass mDa PPM DBE i-FIT Norm Conf(%) Formula

288.1236 288.1236 0.0 0.0 8.5 987.5 n/a n/a C16 H18 N O4

Fraction A13

Fraction A13, RT = 3.30 min

Mass Calc. Mass mDa PPM DBE i-FIT Norm Conf(%) Formula

274.1444 274.1443 0.1 0.4 7.5 1706.2 n/a n/a C16 H20 N O3
